# Supplementary material
Source: Royal Society of Chemistry journal article supplement (doi:10.1039/d6cc01893a)
Supplement: d6cc01893a1.pdf [file d6cc01893a1.pdf]

## Electronic Supplementary Information

### Reversing the Activity Landscape of MoS<sub>x</sub> Electrocatalysts via Ni<sub>x</sub>P Interfacial Coupling for Alkaline Hydrogen Evolution

Ioannis Vamvasakis,<sup>\*a</sup> Aggelos Grammenos<sup>b</sup> and Gerasimos S. Armatas<sup>\*a</sup>

<sup>a</sup> Department of Materials Science and Engineering, University of Crete, Vassilika Vouton, Heraklion 70013, Greece.

<sup>b</sup> Department of Chemistry, University of Crete, Vassilika Vouton, Heraklion 70013, Greece.

<sup>\*</sup>Corresponding authors. E-mail address: j.vamvasakis@uoc.gr, garmatas@uoc.gr

#### Experimental Section

##### Chemicals and reagents

Sodium molybdate dihydrate (Na<sub>2</sub>MoO<sub>4</sub>·2H<sub>2</sub>O), nickel(II) chloride hexahydrate (NiCl<sub>2</sub>·6H<sub>2</sub>O, ≥98%), iron(III) nitrate nonahydrate (Fe(NO<sub>3</sub>)<sub>3</sub>·9H<sub>2</sub>O, ≥98%), nickel(II) nitrate hexahydrate (Ni(NO<sub>3</sub>)<sub>2</sub>·6H<sub>2</sub>O, ≥98%), sodium hypophosphite monohydrate (NaH<sub>2</sub>PO<sub>2</sub>·H<sub>2</sub>O, ≥99%), sodium sulfide nonahydrate (Na<sub>2</sub>S·9H<sub>2</sub>O, ≥98%), hydrochloric acid (HCl, ≥37%, ACS reagent grade), ammonium chloride (NH<sub>4</sub>Cl), Nafion solution (5 wt. %), and deuterium oxide (D<sub>2</sub>O, 99.8%) were purchased from Sigma-Aldrich. Ammonium hydroxide solution (≈25% NH<sub>3</sub> basis), ethanol (≥98%) and potassium hydroxide (KOH, ≥85%) were supplied by Honeywell. Pt/C (20 wt. %) was purchased from Johnson Matthey Chemicals Ltd. All chemical were used as received without further purification. Double distilled water was used in this work.

##### Synthesis of MoS<sub>x</sub>-based catalysts

###### Preparation of precursor solutions

The tetrathiomolybdate precursor solution used for MoS<sub>x</sub> electrodeposition was prepared by initially dissolving 2.25 mmol of Na<sub>2</sub>MoO<sub>4</sub> in 40 mL of deionized (DI) water, forming solution A. In a separate beaker, 10 mmol of Na<sub>2</sub>S were dissolved in 20 mL of DI water to obtain solution B. Subsequently, solutions A and B were combined under continuous stirring, and additional DI water was added to reach a final volume of 150 mL. The pH of the resulting mixture was adjusted to 8 using HCl. Upon pH adjustment, the solution color changed from colorless to dark red, indicating the formation of thiomolybdate species. The Ni-P precursor solution used for Ni<sub>x</sub>P electrodeposition was prepared by dissolving 50 mmol of NH<sub>4</sub>Cl in 200 mL of DI water. Subsequently, 5 mmol of NiCl<sub>2</sub> were added and allowed to fully dissolve. Finally, 50 mmol of NaH<sub>2</sub>PO<sub>2</sub> were introduced into the solution. The pH was then adjusted to 9 using ammonium hydroxide, providing appropriate conditions for subsequent electrodeposition.

###### Synthesis of MoS<sub>x</sub>

MoS<sub>x</sub> films were deposited on carbon cloth (CC) substrates via potentiostatic electrodeposition using a three-electrode configuration. The CC substrate served as the working electrode (WE), carbon paper as the counter electrode (CE), and a saturated calomel electrode (SCE, sat. KCl, 0.244 V vs SHE) as the reference electrode (RE). Prior to deposition, the CC substrates (1 × 2 cm<sup>2</sup>) were thoroughly cleaned by sequential ultrasonication in acetone, 2 M HCl, DI water, and ethanol for 15 min each solvent, followed by drying at 60 °C for 12 h. The pre-treated substrate (with an exposed geometric area of 1 cm<sup>2</sup>) was then immersed in the tetrathiomolybdate precursor solution. Electrodeposition of MoS<sub>x</sub> was carried out by chronoamperometry at a constant potential of -1.5 V vs SCE for 30 min at room temperature. The deposition time was selected based on preliminary electrocatalytic optimization studies (data not shown). After deposition, the WE was thoroughly rinsed with DI water and ethanol, and then dried at 60 °C overnight.

###### Synthesis of MoS<sub>x</sub>-800

The MoS<sub>x</sub>-800 sample was obtained by post-annealing an electrodeposited MoS<sub>x</sub> electrode on CC, as described above. The as-prepared electrode was annealed at 800 °C for 2 h in a sulfur-rich Ar atmosphere using a tube furnace. To ensure a sulfur-rich environment during treatment, approximately 50 mg of sulfur

powder was placed in an alumina boat, with the sample electrode positioned above it. After annealing, the sample was thoroughly rinsed with DI water and ethanol, and then dried at 60 °C overnight.

### **Synthesis of MoS<sub>x</sub>-hydro**

The MoS<sub>x</sub>-hydro electrode was synthesized via a hydrothermal method using the same tetrathiomolybdate precursor solution (pH=8) employed for electrodeposition. A pre-cleaned CC substrate was immersed in 15 mL of this solution inside a 25 mL Teflon-lined stainless-steel autoclave. The autoclave was heated at 200 °C for 14 h and then allowed to cool naturally to room temperature. The resulting electrode was removed, thoroughly rinsed with DI water and ethanol, and dried at 60 °C overnight.

For comparison, the powder precipitate formed during the hydrothermal process (denoted MoS<sub>x</sub>-hydro-powder) was collected by centrifugation, washed several times with DI water and ethanol, and dried at 60 °C overnight.

### **Synthesis of Ni<sub>x</sub>P-modified MoS<sub>x</sub> catalysts**

Ni<sub>x</sub>P-modified MoS<sub>x</sub>-based electrodes were prepared via electrodeposition using a conventional three-electrode configuration. The as-prepared MoS<sub>x</sub> samples on CC substrates served as the WE, nickel foam as the CE, and an SCE as the RE. Each WE, with an exposed geometric area of 1 cm<sup>2</sup>, was immersed in the nickel-hypophosphite precursor solution. Electrodeposition was performed galvanostatically at a constant current of -20 mA for 30 min at room temperature. The deposition time was selected based on preliminary optimization studies (data not shown). After deposition, the electrodes were thoroughly rinsed with DI water and ethanol, and then dried overnight at 60 °C. Using this procedure, a series of Ni<sub>x</sub>P-modified MoS<sub>x</sub> electrodes were fabricated, denoted as Ni<sub>x</sub>P/MoS<sub>x</sub>, Ni<sub>x</sub>P/MoS<sub>x</sub>-800, and Ni<sub>x</sub>P/MoS<sub>x</sub>-hydro, according to the respective MoS<sub>x</sub> precursor.

For comparison, a bare Ni<sub>x</sub>P reference electrode was prepared under identical conditions using a clean CC substrate as the WE. In addition, Ni/MoS<sub>x</sub> and Ni-only control samples were synthesized following the same electrodeposition protocol using the nickel precursor solution without NaH<sub>2</sub>PO<sub>2</sub>.

### **Preparation of Pt/C catalyst**

The Pt/C benchmark electrocatalyst was prepared by dispersing 5 mg of commercial 20 wt.% Pt/C powder in 1 mL of a water/ethanol mixture (1:3 v/v) containing 80 μL of 5 wt.% Nafion solution. The mixture was ultrasonicated for 30 min to obtain a homogeneous ink. Subsequently, 300 μL of the ink was drop-cast onto a pre-cleaned CC substrate with an exposed geometric area of 1 cm<sup>2</sup>, followed by drying at 60 °C for 4 h.

### **Preparation of NiFe-LDH**

The NiFe-layered double hydroxide (NiFe-LDH) electrode was synthesized via electrodeposition following the procedure of Quiroz et al.<sup>1</sup>, with slight modifications. Briefly, the deposition was conducted in a standard three-electrode cell configuration, using a carbon plate as the CE, a SCE as the RE, and nickel foam (1 × 2 cm<sup>2</sup>) as the WE. Prior to deposition, the nickel foam substrate was sequentially ultrasonicated in acetone, dilute HCl, and ethanol for 15 min in each solvent, and then dried at 80 °C for 30 min. The electrolyte solution (100 mL) contained Ni(NO<sub>3</sub>)<sub>2</sub> and Fe(NO<sub>3</sub>)<sub>3</sub> as metal precursors, with a Ni:Fe molar ratio of 15:1. Electrodeposition was carried out at a constant potential of -1.2 V vs SCE for 40 min at room temperature. After deposition, the electrode was thoroughly rinsed with DI water and ethanol, and then dried at 80 °C for 60 min. The effective deposition area was maintained at 1 × 1 cm<sup>2</sup> throughout the process.

### **Materials characterizations**

Field-emission scanning electron microscopy (SEM) and energy-dispersive X-ray spectroscopy (EDS) were carried out using a JEOL JSM-IT700HR microscope operated at 20 kV. EDS data acquisition was conducted from multiple areas of each sample using an accelerating voltage of 20 kV and a 60-s accumulation time. X-ray diffraction (XRD) patterns were collected on a Rigaku SmartLab X-ray diffractometer using Cu K $\alpha$  radiation ( $\lambda=1.5406$  Å), operated at 40 kV and 50 mA. Raman measurements at room temperature were performed with a Thermo Scientific DXR3xi Raman imaging microscope equipped with a 532 nm laser. The laser power was maintained at 3 mW for maximum clarity and measurements were carried out with an Olympus 50 $\times$  objective with 0.8 numerical aperture. X-ray photoelectron spectroscopy (XPS) was performed on a SPECS spectrometer equipped with a Phoibos 100 1D-DLD electron analyser using monochromatic Al K $\alpha$  radiation ( $h\nu=1486.6$  eV). Analyses were performed on freshly prepared samples with particular care taken to minimize air exposure prior to measurement. All

binding energies were calibrated against the adventitious C 1s peak at 284.8 eV. Peak deconvolution was conducted with SpecsLab Prodigy software using Gaussian-Lorentzian line profiles after Shirley background subtraction.

### Electrochemical measurements

The electrocatalytic hydrogen evolution reaction (HER) performance of all prepared catalysts was evaluated in an alkaline electrolyte (1.0 M KOH, pH=14) at room temperature using a simple one-compartment three-electrode system connected to a VersaSTAT 4 electrochemical workstation (Princeton Applied Research). The three-electrode setup comprised the as-prepared catalysts deposited on CC (1 cm<sup>2</sup> geometric area) as the WE, a carbon rod as the CE, and a Hg/HgO electrode (in 1.0 M KOH) as the RE. Polarization curves were obtained via linear sweep voltammetry (LSV) at a scan rate of 5 mV s<sup>-1</sup>. All measurements were repeated at least three times to ensure reproducibility. The measured potentials were corrected for *iR* drop using the uncompensated solution resistance (*R<sub>s</sub>*) determined via electrochemical impedance spectroscopy (EIS) and were converted to the reversible hydrogen electrode (RHE) scale using the following equation:

$$E_{\text{RHE}} = E_{\text{Hg/HgO}} + 0.098 + 0.059 \times \text{pH} \text{ (at 25 } ^\circ\text{C)} \quad (1)$$

where,  $E_{\text{Hg/HgO}}$  is the measured potential versus the Hg/HgO reference electrode, and  $E_{\text{RHE}}$  is the potential converted to the RHE scale.

Tafel slopes were determined by fitting the linear portion of the Tafel plots using:

$$\eta = b \cdot \log|J| + \alpha \quad (2)$$

where  $\eta$  is the overpotential (V) calculated by  $\eta = 0 - E_{\text{RHE}}$ ,  $J$  is the current density (mA cm<sup>-2</sup>),  $b$  is the Tafel slope (mV dec<sup>-1</sup>), and  $\alpha$  is a constant.

Electrochemical stability was evaluated by chronopotentiometry in 1.0 M KOH at a constant current density of -10 mA cm<sup>-2</sup>.

Electrochemically active surface area (ECSA) was estimated from the double-layer capacitance ( $C_{\text{dl}}$ ), which was determined by cyclic voltammetry (CV) measurements performed in 1.0 M KOH at scan rates ranging from 20 to 180 mV s<sup>-1</sup>. These measurements were conducted within a non-Faradaic potential window (-0.15 V to -0.25 V vs Hg/HgO). The capacitive current density ( $j$ ) is linearly proportional to the scan rate ( $v$ ), and  $C_{\text{dl}}$  was obtained from the slope of the plot of current density difference ( $\Delta j = (j_a - j_c)/2$ ) versus  $v$ , according to:

$$C_{\text{dl}} = \frac{|j_a - j_c|}{2v} \quad (3)$$

where  $j_a$  and  $j_c$  are the anodic and cathodic current densities at the midpoint of the potential window, respectively.

The ECSA is then calculated by:

$$\text{ECSA} = \frac{A \cdot C_{\text{dl}}}{C_s} \quad (4)$$

where  $A$  is the geometric surface area (cm<sup>2</sup>) and  $C_s$  is the specific capacitance of a flat surface of an electrode material, with a typical reported value of 0.040 mF cm<sup>-2</sup> in alkaline solutions.<sup>2</sup>

EIS measurements were carried out in 1.0 M KOH using a standard three-electrode configuration over a frequency range of 100 kHz to 0.1 Hz, with a 10 mV AC perturbation. For conventional EIS measurements, a DC bias of -1.2 V vs Hg/HgO was applied, while a range of applied potentials was used in operando EIS experiments.

Kinetic isotope effect (KIE =  $J_{\text{H}_2\text{O}}/J_{\text{D}_2\text{O}}$ ) measurements were performed using LSV in both 1.0 M KOH/H<sub>2</sub>O and 1.0 M KOH/D<sub>2</sub>O electrolytes under identical conditions. A three-electrode cell was employed, in which

the catalyst-loaded CC served as the WE, and a Hg/HgO (1.0 M KOH) electrode and a Pt wire were used as the RE and CE, respectively. LSV scans were recorded at a scan rate of 5 mV s<sup>-1</sup>.

### Supporting figures and tables

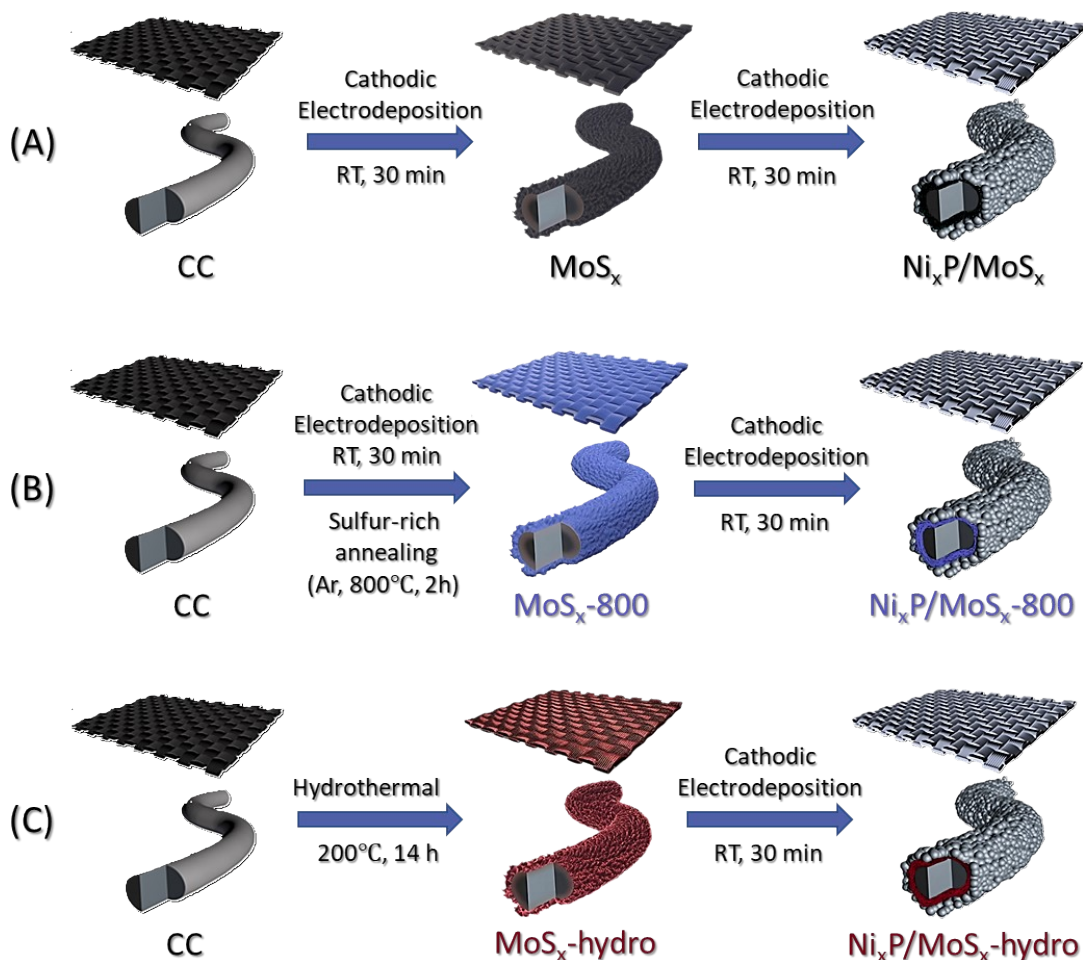

**Fig. S1.** Schematic illustration of the synthesis procedures: (A) cathodic electrodeposition of MoS<sub>x</sub> and subsequent deposition of Ni<sub>x</sub>P to form Ni<sub>x</sub>P/MoS<sub>x</sub> on carbon cloth (CC), (B) preparation of MoS<sub>x</sub>-800 via cathodic electrodeposition followed by sulfur-rich annealing under Ar-atmosphere at 800 °C, and subsequent Ni<sub>x</sub>P deposition to yield Ni<sub>x</sub>P/MoS<sub>x</sub>-800, and (C) hydrothermal synthesis of MoS<sub>x</sub>-hydro on CC, followed by Ni<sub>x</sub>P electrodeposition to obtain Ni<sub>x</sub>P/MoS<sub>x</sub>-hydro.

Fig. S1 illustrates the synthesis procedure of Ni<sub>x</sub>P-modified MoS<sub>x</sub> catalysts. Initially, three MoS<sub>x</sub>-based electrodes were prepared on carbon cloth (CC), followed by surface modification through deposition of a Ni<sub>x</sub>P overlayer. The first electrode (MoS<sub>x</sub>) was prepared via a single-step cathodic electrodeposition at room temperature, based on the electrochemical reduction of tetrathiomolybdate ions (MoS<sub>4</sub><sup>2-</sup>) on the CC substrate (Fig. S1a):

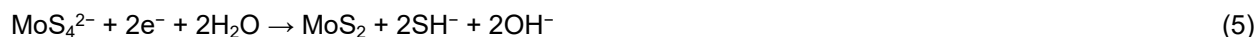

The tetrathiomolybdate precursors were generated by reacting molybdate (MoO<sub>4</sub><sup>2-</sup>) with excess sulfide (S<sup>2-</sup>) under mildly acidic conditions (Eq. 6). The precursor solution was prepared by dissolving Na<sub>2</sub>MoO<sub>4</sub> and excess Na<sub>2</sub>S in water, followed by pH adjustment to 8 using HCl. The observed color transition from colorless to dark red indicated the formation of thiomolybdate species:

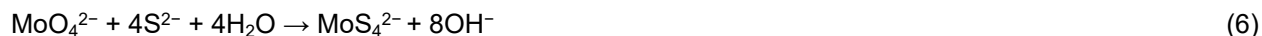

As previously reported, MoS<sub>x</sub> layers obtained via MoS<sub>4</sub><sup>2-</sup> electrodeposition are typically X-ray amorphous with composition close to MoS<sub>2</sub>.<sup>34</sup>

The second electrode (MoS<sub>x</sub>-800) was obtained by annealing the as-deposited MoS<sub>x</sub> at 800 °C for 2 h under a sulfur-rich Ar atmosphere (Fig. S1b).

The third electrode (MoS<sub>x</sub>-hydro) was synthesized via a hydrothermal method (Fig. S1C), involving the growth of MoS<sub>2</sub> nanosheets directly on CC fibers at 200 °C for 14 h using the same MoS<sub>4</sub><sup>2-</sup> precursor solution (pH=8). The simplified reaction pathway is:

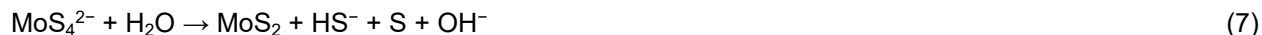

Finally, all MoS<sub>x</sub> electrodes were modified by galvanostatic electrodeposition of Ni<sub>x</sub>P at room temperature to yield Ni<sub>x</sub>P/MoS<sub>x</sub>, Ni<sub>x</sub>P/MoS<sub>x</sub>-800 and Ni<sub>x</sub>P/MoS<sub>x</sub>-hydro heterostructures. This process involves the cathodic co-deposition of Ni and P species<sup>5</sup>, as described by:

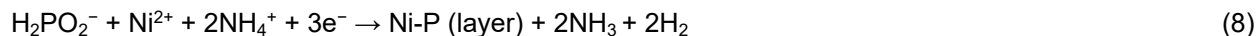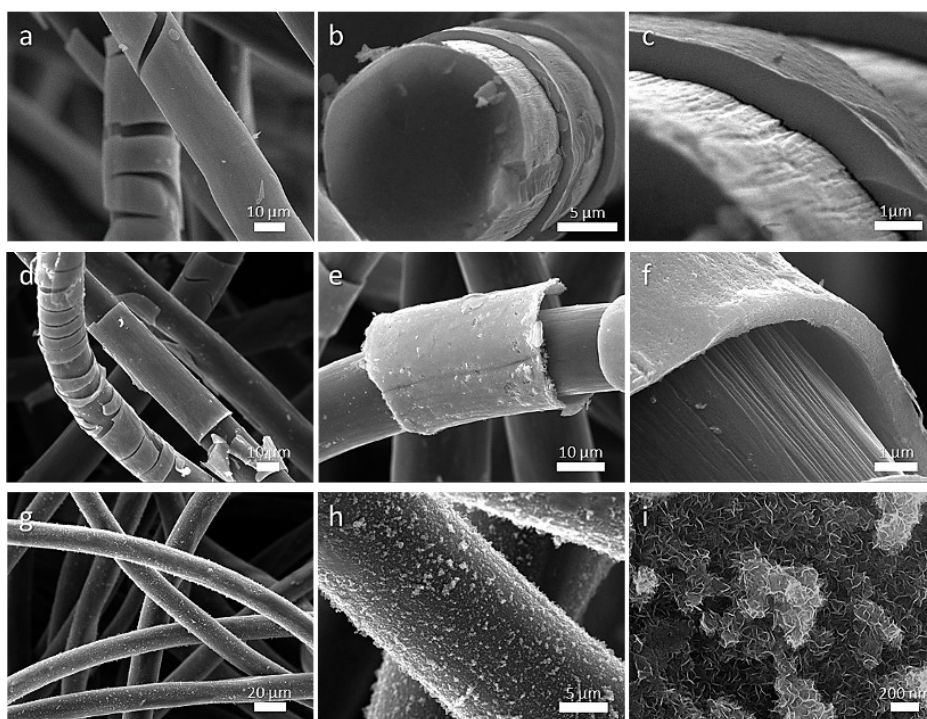

**Fig. S2.** Representative SEM images of as-synthesized MoS<sub>x</sub> samples on carbon cloth (CC): (a–c) electrodeposited MoS<sub>x</sub>, (d–f) thermally annealed MoS<sub>x</sub>-800, and (g–i) the hydrothermally synthesized MoS<sub>x</sub>-hydro.

SEM images of the electrodeposited MoS<sub>x</sub> (Fig. S2a–c) reveal a uniform, featureless film conformally coating the carbon cloth (CC) fibers, with a thickness of ≈0.8–1 μm (Fig. S2c). This homogeneous coverage indicates efficient nucleation and growth during electrodeposition process. Localized shearing and tearing are evident, which can be attributed to shrinkage-induced mechanical stress during drying. Importantly, high-magnification imaging (Fig. S2c) confirms intimate interfacial contact between the MoS<sub>x</sub> layer and the CC substrate, which is expected to minimize contact resistance and promote charge transfer during electrochemical operation. Following annealing at 800 °C, the MoS<sub>x</sub>-800 sample (Fig. S2d–f) largely preserves a smooth surface morphology but exhibits increased fragmentation, as evidenced by more pronounced cracking and shearing (Fig. S2d,e). The film thickness decreases by ≈25% (Fig. S2f), consistent with thermally induced densification. In contrast, the hydrothermally synthesized MoS<sub>x</sub>-hydro sample displays a distinctly different morphology (Fig. S2g–i). Although maintaining full coverage of the CC

fibers, the surface exhibits a rough, hierarchical textured structure (Fig. S2g,h). High-magnification images (Fig. S2i) reveal vertically aligned nanosheets extending from the fiber surface, resulting in a high density of exposed edge sites.

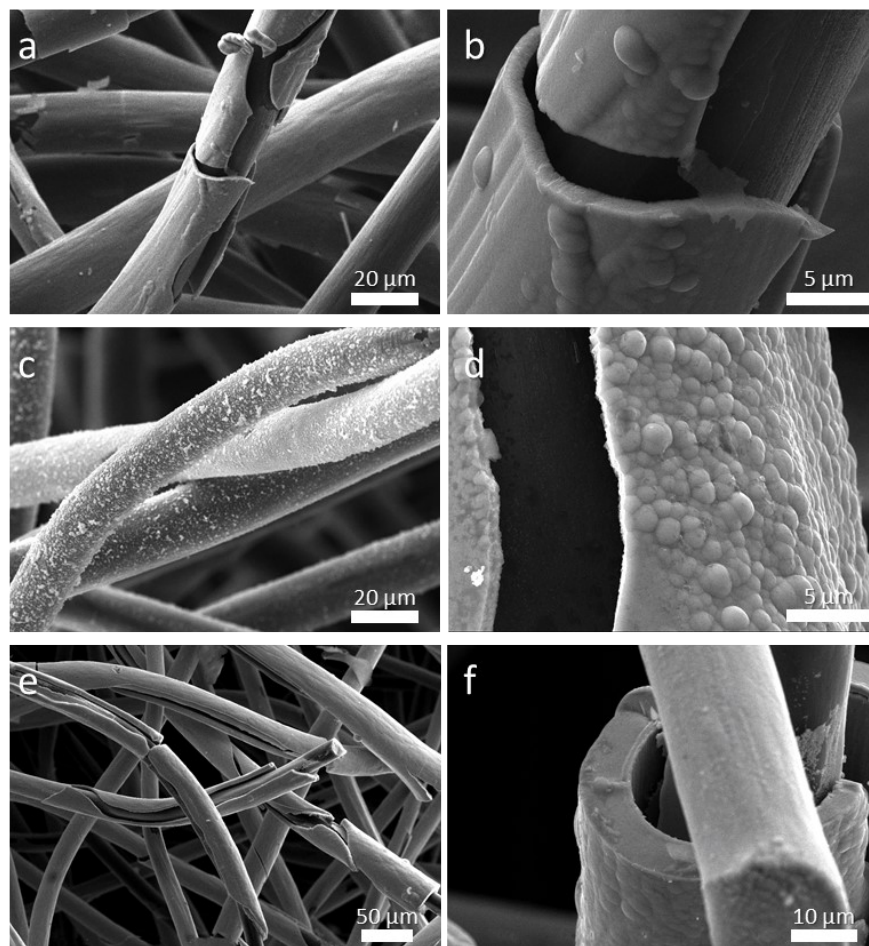

**Fig. S3.** Representative SEM images of (a, b)  $\text{Ni}_x\text{P}/\text{MoS}_x\text{-800}$ , (c, d)  $\text{Ni}_x\text{P}/\text{MoS}_x\text{-hydro}$ , and (e, f)  $\text{Ni}_x\text{P}$  deposited directly on carbon cloth (CC).

Following *in situ* electrodeposition of  $\text{Ni}_x\text{P}$  onto the different  $\text{MoS}_x$  electrodes, distinct morphological variations are observed, highlighting the critical role of the underlying  $\text{MoS}_x$  structure in governing  $\text{Ni}_x\text{P}$  nucleation and growth behavior.  $\text{Ni}_x\text{P}/\text{MoS}_x$  exhibits a roughened surface composed of densely distributed  $\text{Ni}_x\text{P}$  nanoparticles (Fig. 1a,b), whereas deposition on  $\text{MoS}_x\text{-800}$  (Fig. S3a,b) yields a comparatively smoother and thicker  $\text{Ni}_x\text{P}$  overlayer. High-magnification imaging (Fig. S3b) suggests partial coalescence of the nanoparticles into a more continuous film, resembling the morphology of  $\text{Ni}_x\text{P}$  electrodeposited directly onto bare carbon cloth (Fig. S3e,f). In contrast, the  $\text{Ni}_x\text{P}/\text{MoS}_x\text{-hydro}$  sample (Fig. S3c,d) preserves the nanosheet framework of the hydrothermally grown  $\text{MoS}_x$ . In this case,  $\text{Ni}_x\text{P}$  nanoparticles conformally decorate the nanosheet surface. High-magnification image (Fig. S3d) reveals a characteristic knobby outer-layer morphology that closely follows the contours of the underlying nanosheets.

**Table S1.** Elemental composition of MoS<sub>x</sub>, MoS<sub>x</sub>-800 and MoS<sub>x</sub>-hydro samples, together with their corresponding Ni<sub>x</sub>P-modified heterostructures, determined by EDS analysis. Data for the Ni<sub>x</sub>P-only electrode and post-stability Ni<sub>x</sub>P/MoS<sub>x</sub> sample are also given.

| Sample                                                 | Mo (at%) | S (at%) | Ni (at%) | P (at%) | Mo:S ratio | Ni:P ratio |
|--------------------------------------------------------|----------|---------|----------|---------|------------|------------|
| MoS <sub>x</sub>                                       | 40.82    | 59.18   | -        | -       | 1:1.4      | -          |
| MoS <sub>x</sub> -800                                  | 35.79    | 64.21   | -        | -       | 1:1.8      | -          |
| MoS <sub>x</sub> -hydro                                | 33.43    | 66.57   | -        | -       | 1:2.0      | -          |
| Ni <sub>x</sub> P                                      | -        | -       | 89.92    | 10.08   | -          | 9:1        |
| Ni <sub>x</sub> P/MoS <sub>x</sub>                     | 2.70     | 3.73    | 87.33    | 6.25    | 1:1.4      | 14:1       |
| Ni <sub>x</sub> P/MoS <sub>x</sub> -800                | 1.92     | 3.54    | 86.70    | 7.84    | 1:1.8      | 11:1       |
| Ni <sub>x</sub> P/MoS <sub>x</sub> -hydro              | 1.76     | 3.58    | 88.47    | 6.19    | 1:2.0      | 14:1       |
| Ni <sub>x</sub> P/MoS <sub>x</sub> after long-term HER | 2.28     | 5.36    | 86.36    | 6.00    | 1:2.0      | 14:1       |

EDS analysis confirms the presence of Mo and S in all MoS<sub>x</sub> samples, with Mo:S ratios approaching the 1:2 stoichiometry of MoS<sub>2</sub> (Table S1). The electrodeposited MoS<sub>x</sub> sample is substoichiometric (Mo:S ≈ 1:1.4 ± 0.07), indicative of sulfur-deficient structure, which are been widely reported to enhance HER activity.<sup>6–8</sup> Upon annealing at 800 °C in a sulfur-rich atmosphere, the MoS<sub>x</sub>-800 sample exhibits an increased sulfur content (Mo:S ≈ 1:1.8 ± 0.01), while the hydrothermally synthesized MoS<sub>x</sub>-hydro approaches near-stoichiometric composition (Mo:S ≈ 1:2 ± 0.13), consistent with the formation of MoS<sub>2</sub>-like phases. Following Ni<sub>x</sub>P deposition, EDS spectra show a marked attenuation of Mo and S signals, accompanied by dominant Ni and P contributions. This behavior arises from X-ray attenuation by the surface Ni<sub>x</sub>P overlayer, which partially absorbs emissions from the underlying MoS<sub>x</sub> layer, a well-recognized limitation of SEM-EDS analysis in multilayered structures.<sup>6–8</sup> Importantly, the Mo:S ratios remain essentially unchanged (1:1.4, 1:1.8, and ≈1:2 for Ni<sub>x</sub>P/MoS<sub>x</sub>, Ni<sub>x</sub>P/MoS<sub>x</sub>-800, and Ni<sub>x</sub>P/MoS<sub>x</sub>-hydro, respectively), indicating preservation of the underlying MoS<sub>x</sub> composition during Ni<sub>x</sub>P electrodeposition. The Ni<sub>x</sub>P-containing samples exhibit Ni-rich compositions, with Ni:P ratios of 9:1 for Ni<sub>x</sub>P, 11:1 for Ni<sub>x</sub>P/MoS<sub>x</sub>-800, and 14:1 for both Ni<sub>x</sub>P/MoS<sub>x</sub> and Ni<sub>x</sub>P/MoS<sub>x</sub>-hydro. These values are consistent with the formation of Ni–P alloy-like coatings rather than stoichiometric nickel phosphides, in line with typical electrodeposited Ni–P films, where P is incorporated as a minor component (typically 6–24 at%).<sup>9,10</sup> Notably, the higher Ni:P ratios observed for the heterostructures relative to Ni<sub>x</sub>P deposited on bare carbon cloth suggest that the MoS<sub>x</sub> surface affects nucleation dynamics, promoting preferential Ni deposition during the early stages of electrodeposition. This effect likely arises from initial Ni nucleation at MoS<sub>x</sub> active sites, followed by Ni–P growth. This behavior likely involves initial Ni nucleation at active sites on MoS<sub>x</sub>, followed by subsequent Ni–P co-deposition, ultimately yielding Ni-enriched overlayers. The similar Ni:P ratios (≈14:1) for Ni<sub>x</sub>P/MoS<sub>x</sub> and Ni<sub>x</sub>P/MoS<sub>x</sub>-hydro are consistent with their comparable nanoparticulate morphologies, whereas the lower ratio observed for Ni<sub>x</sub>P/MoS<sub>x</sub>-800 (≈11:1) correlates with its more compact coating. These results confirm the formation of well-defined Ni<sub>x</sub>P/MoS<sub>x</sub> heterostructures, in which the MoS<sub>x</sub> layer retains its composition while the Ni<sub>x</sub>P overlayer forms a Ni-rich, alloy-like coating governed by substrate-dependent nucleation mechanism.

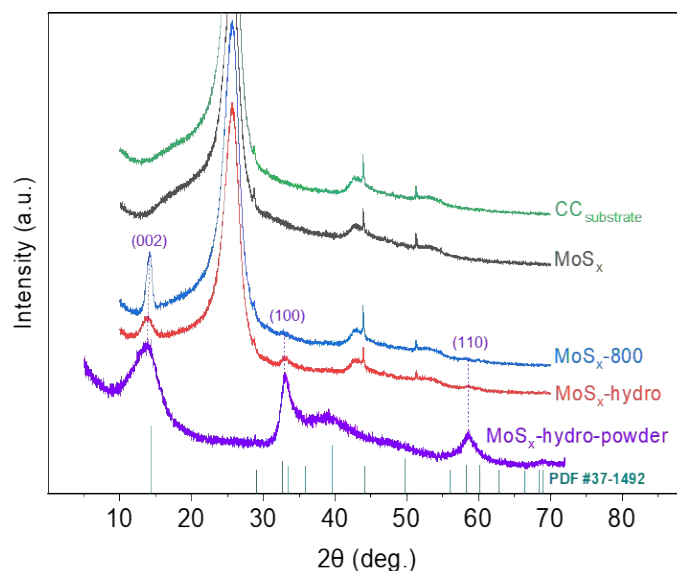

**Fig. S4.** X-ray diffraction (XRD) patterns of  $\text{MoS}_x$ ,  $\text{MoS}_x$ -hydro and  $\text{MoS}_x$ -800. For comparison, XRD patterns of bare carbon cloth (CC), the hydrothermally synthesized  $\text{MoS}_x$  powder ( $\text{MoS}_x$ -hydro-powder), and the reference 2H- $\text{MoS}_2$  phase (PDF #37-1392) are also included.

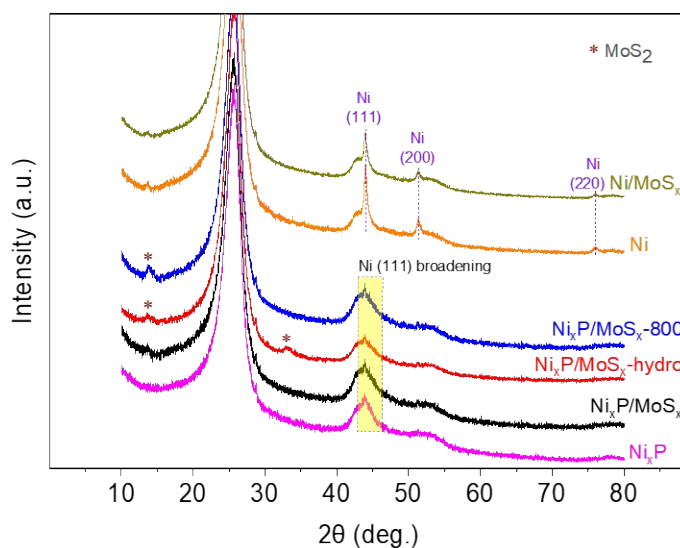

**Fig. S5.** X-ray diffraction (XRD) patterns of  $\text{Ni}_x\text{P}$ -modified  $\text{MoS}_x$ ,  $\text{MoS}_x$ -hydro and  $\text{MoS}_x$ -800 heterostructures. For comparison, XRD patterns of electrodeposited Ni on carbon cloth (CC) and  $\text{Ni}/\text{MoS}_x$  control samples are also included.

All  $\text{Ni}_x\text{P}$ -containing samples display a broad diffraction feature at  $2\theta \approx 44^\circ$ , which is attributed to the (111) reflection of Ni. The pronounced peak broadening indicates that the deposited  $\text{Ni}_x\text{P}$  phase is predominantly amorphous or nanocrystalline in nature, with only a minor contribution from crystalline Ni domains. In contrast,  $\text{Ni}/\text{MoS}_x$  and Ni-only control samples exhibit well-defined, sharp reflections at  $2\theta \approx 44^\circ$ ,  $51^\circ$  and  $76^\circ$ , corresponding to the (111), (200) and (220) planes of face-centered cubic (fcc) Ni, respectively.

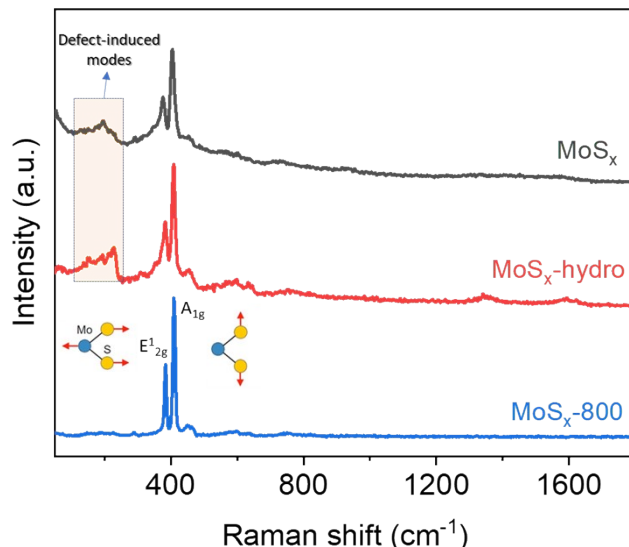

**Fig. S6.** Raman spectra of as-synthesized MoS<sub>x</sub>, MoS<sub>x</sub>-hydro and MoS<sub>x</sub>-800.

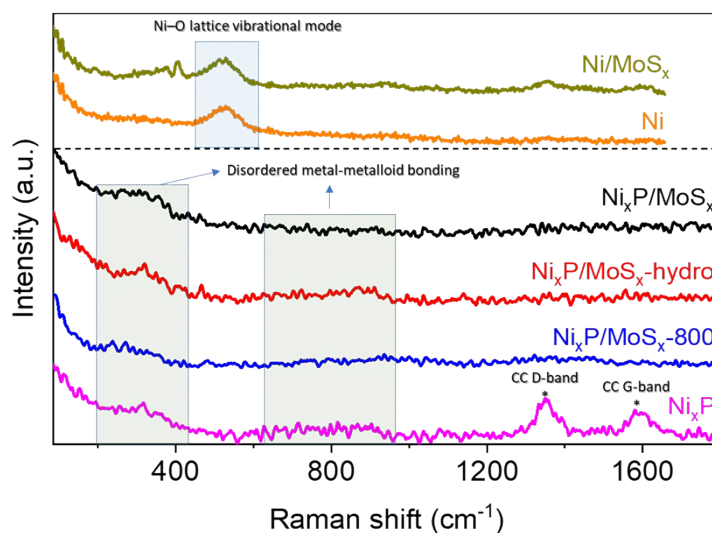

**Fig. S7.** Raman spectra of Ni<sub>x</sub>P-modified MoS<sub>x</sub>, MoS<sub>x</sub>-hydro and MoS<sub>x</sub>-800 samples. For comparison, spectra of Ni<sub>x</sub>P, Ni-only, and Ni/MoS<sub>x</sub> control samples are also included. The Ni<sub>x</sub>P spectrum is dominated by the characteristic D ( $\approx 1350$  cm<sup>-1</sup>, disordered sp<sup>3</sup>-hybridized carbon) and G ( $\approx 1580$  cm<sup>-1</sup>, graphitic sp<sup>2</sup>-hybridized carbon) bands of carbon, originating from the underlying carbon cloth substrate.

**Table S2.** XPS fitting parameters results and peak assignments for MoS<sub>x</sub>, Ni<sub>x</sub>P and Ni<sub>x</sub>P/MoS<sub>x</sub>.

| Sample           | Peak   | Binding Energy (eV) | Assignment to chemical species |
|------------------|--------|---------------------|--------------------------------|
| MoS <sub>x</sub> | Mo 3d  | 3d <sub>5/2</sub>   | Mo <sup>4+</sup>               |
|                  |        | 3d <sub>3/2</sub>   | Mo <sup>4+</sup>               |
|                  | Mo 3d  | 3d <sub>5/2</sub>   | Mo <sup>5+</sup>               |
|                  |        | 3d <sub>3/2</sub>   | Mo <sup>5+</sup>               |
|                  | Mo 3d  | 3d <sub>5/2</sub>   | Mo <sup>6+</sup>               |
|                  |        | 3d <sub>3/2</sub>   | Mo <sup>6+</sup>               |
| S 2s             | peak 1 | S 2s                |                                |

|                                                           |       |                   |                         |                                               |
|-----------------------------------------------------------|-------|-------------------|-------------------------|-----------------------------------------------|
|                                                           | S 2p  | 2p <sub>3/2</sub> | 162.4                   | Unsaturated S <sup>2-</sup>                   |
|                                                           |       | 2p <sub>1/2</sub> | 163.6                   |                                               |
|                                                           |       | 2p <sub>3/2</sub> | 163.8                   | Terminal S <sub>2</sub> <sup>2-</sup>         |
|                                                           |       | 2p <sub>1/2</sub> | 165.1                   |                                               |
|                                                           |       | peak 5            | 169.0                   | SO <sub>x</sub> species                       |
| Ni <sub>x</sub> P                                         | Ni 2p | 2p <sub>3/2</sub> | 852.6                   | Ni <sup>0</sup> (Ni-P)                        |
|                                                           |       | 2p <sub>1/2</sub> | 869.8                   |                                               |
|                                                           |       | 2p <sub>3/2</sub> | 856                     | NiO <sub>x</sub> species                      |
|                                                           |       | 2p <sub>1/2</sub> | 873.7                   |                                               |
|                                                           |       | sat. 1            | 861.9                   | Satellites                                    |
|                                                           |       | sat. 2            | 880.3                   |                                               |
|                                                           | P 2p  | 2p <sub>3/2</sub> | 129.5                   | P-Metal bond (Ni-P)                           |
|                                                           |       | 2p <sub>1/2</sub> | 130.4                   |                                               |
|                                                           |       | peak 3            | 133.0                   | PO <sub>x</sub> species                       |
| Ni <sub>x</sub> P/MoS <sub>x</sub>                        | Mo 3d | 3d <sub>5/2</sub> | 228.6                   | Mo <sup>4+</sup>                              |
|                                                           |       | 3d <sub>3/2</sub> | 231.8                   |                                               |
|                                                           |       | 3d <sub>5/2</sub> | 232.5                   | Mo <sup>6+</sup>                              |
|                                                           |       | 3d <sub>3/2</sub> | 235.6                   |                                               |
|                                                           | S 2s  | peak 1            | 226.1                   | S 2s                                          |
|                                                           | S 2p  | 2p <sub>3/2</sub> | 161.9                   | Unsaturated S <sup>2-</sup>                   |
|                                                           |       | 2p <sub>1/2</sub> | 163.0                   |                                               |
|                                                           |       | 2p <sub>3/2</sub> | 163.7                   | Terminal S <sub>2</sub> <sup>2-</sup>         |
|                                                           |       | 2p <sub>1/2</sub> | 165.0                   |                                               |
|                                                           |       | peak 5            | 168.1                   | SO <sub>x</sub> species                       |
|                                                           | Ni 2p | 2p <sub>3/2</sub> | 852.9                   | Ni <sup>0</sup> (Ni-P)                        |
|                                                           |       | 2p <sub>1/2</sub> | 870.2                   |                                               |
|                                                           |       | 2p <sub>3/2</sub> | 856.0                   | NiO <sub>x</sub> species                      |
|                                                           |       | 2p <sub>1/2</sub> | 873.8                   |                                               |
|                                                           |       | sat. 1            | 861.7                   | Satellites                                    |
|                                                           |       | sat. 2            | 880.2                   |                                               |
|                                                           | P 2p  | 2p <sub>3/2</sub> | 129.8                   | P-Metal bond (Ni-P)                           |
|                                                           |       | 2p <sub>1/2</sub> | 130.7                   |                                               |
| peak 3                                                    |       | 133               | PO <sub>x</sub> species |                                               |
| Ni <sub>x</sub> P/MoS <sub>x</sub><br>after long-term HER | Mo 3d | 3d <sub>5/2</sub> | 228.7                   | Mo <sup>4+</sup>                              |
|                                                           |       | 3d <sub>3/2</sub> | 231.9                   |                                               |
|                                                           | S 2p  | peak 1            | 168.3                   | SO <sub>x</sub> species                       |
|                                                           | Ni 2p | 2p <sub>3/2</sub> | 855.5                   | Ni <sup>2+</sup> species<br>(hydroxylated Ni) |
|                                                           |       | 2p <sub>1/2</sub> | 872.9                   |                                               |
|                                                           |       | sat. 1            | 861.3                   | Satellites                                    |
|                                                           |       | sat. 2            | 879.5                   |                                               |
|                                                           | P 2p  | 2p <sub>3/2</sub> | 129.6                   | P-Metal bond (Ni-P)                           |
|                                                           |       | 2p <sub>1/2</sub> | 130.8                   |                                               |
| peak 3                                                    |       | 133.2             | PO <sub>x</sub> species |                                               |

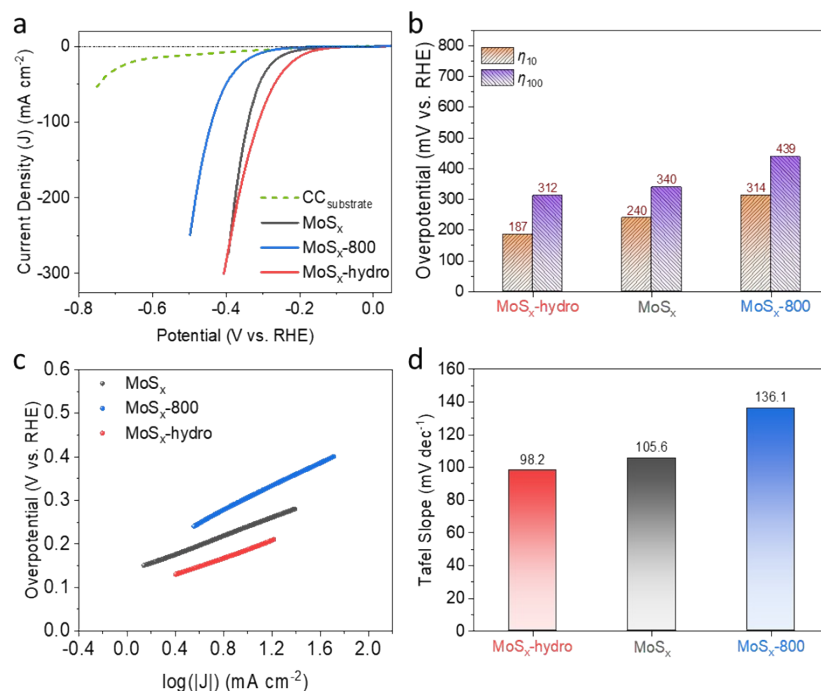

**Fig. S8.** (a) *iR*-corrected LSV curves measured in 1.0 M KOH and (b) corresponding overpotentials at  $-10$  and  $-100$  mA cm<sup>-2</sup> ( $\eta_{10}$  and  $\eta_{100}$ ) for the different MoS<sub>x</sub> catalysts and bare carbon cloth (CC). (c) Tafel plots and (d) corresponding Tafel slopes of the different MoS<sub>x</sub> catalysts.

**Table S3.** Comparison of HER performance of representative Ni<sub>x</sub>P-modified MoS<sub>2</sub>-based electrocatalysts.

| Sample                                                             | Overpotential<br>$\eta_{10}$<br>(mV) | Electrolyte                          | Reference        |
|--------------------------------------------------------------------|--------------------------------------|--------------------------------------|------------------|
| Hierarchical Ni <sub>2</sub> P/MoS <sub>2</sub>                    | ≈200                                 | 0.5 M H <sub>2</sub> SO <sub>4</sub> | 11               |
| Ni-P/MoS <sub>x</sub> hybrid                                       | 140                                  | 1.0 M KOH                            | 12               |
| Ni <sub>2</sub> P@MoS <sub>2</sub> /CC                             | 99                                   | 1.0 M KOH                            | 13               |
| NiP <sub>x</sub> /MoS <sub>2</sub> /CC hybrid                      | 88                                   | 1.0 M KOH<br>+ 0.33M Urea            | 14               |
| 3D/2D Ni <sub>2</sub> P@MoS <sub>2</sub>                           | 181                                  | 1.0 M KOH                            | 15               |
| Ni <sub>2</sub> P-MoS <sub>2</sub> heteronanosheet arrays          | 78                                   | 1.0 M KOH                            | 16               |
| Ni <sub>2</sub> P-black phosphorus (BP)/MoS <sub>2</sub>           | 99                                   | 1.0 M KOH                            | 17               |
| Ni <sub>3</sub> S <sub>2</sub> @Ni <sub>2</sub> P/MoS <sub>2</sub> | 160                                  | 1.0 M KOH                            | 18               |
| <b>Amorphous Ni<sub>x</sub>P/MoS<sub>x</sub></b>                   | <b>96</b>                            | <b>1.0 M KOH</b>                     | <b>This work</b> |

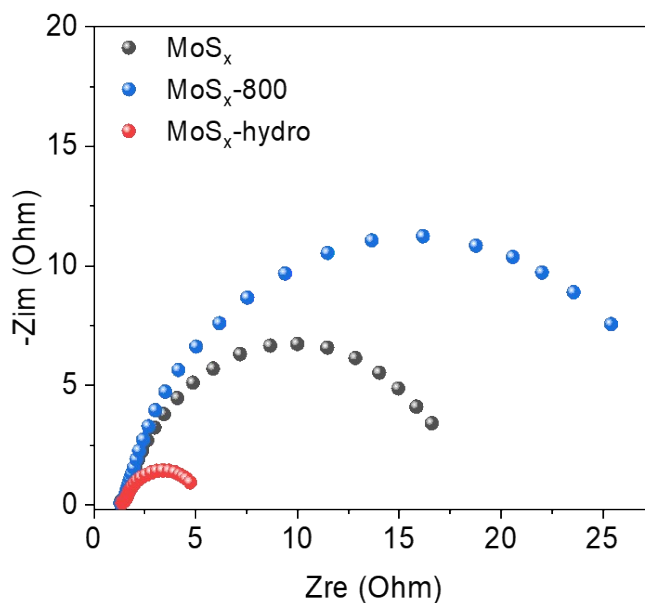

**Fig. S9.** EIS Nyquist plots of pristine  $\text{MoS}_x$ ,  $\text{MoS}_x\text{-hydro}$  and  $\text{MoS}_x\text{-800}$ .

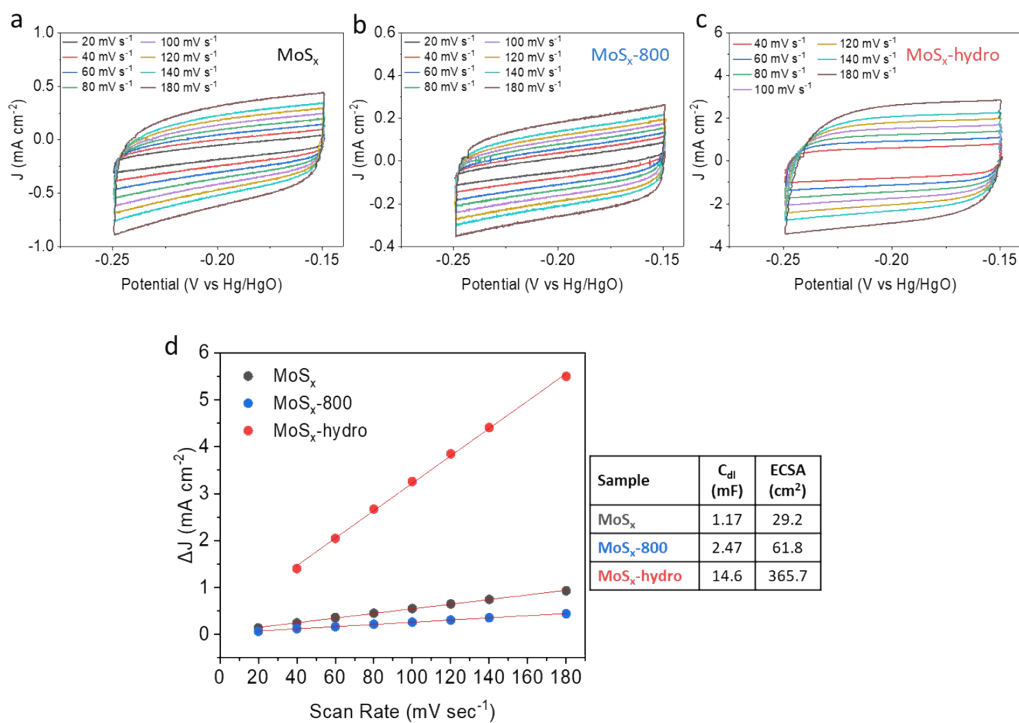

**Fig. S10.** (a-c) Cyclic voltammetry (CV) curves, (d) corresponding plot of capacitive current density ( $\Delta J$ ) versus scan rate, used to determine the double-layer capacitance ( $C_{dl}$ ) and estimate the electrochemically active surface area (ECSA) of  $\text{MoS}_x$ ,  $\text{MoS}_x\text{-hydro}$  and  $\text{MoS}_x\text{-800}$ . Inset: calculated  $C_{dl}$  and ECSA values.

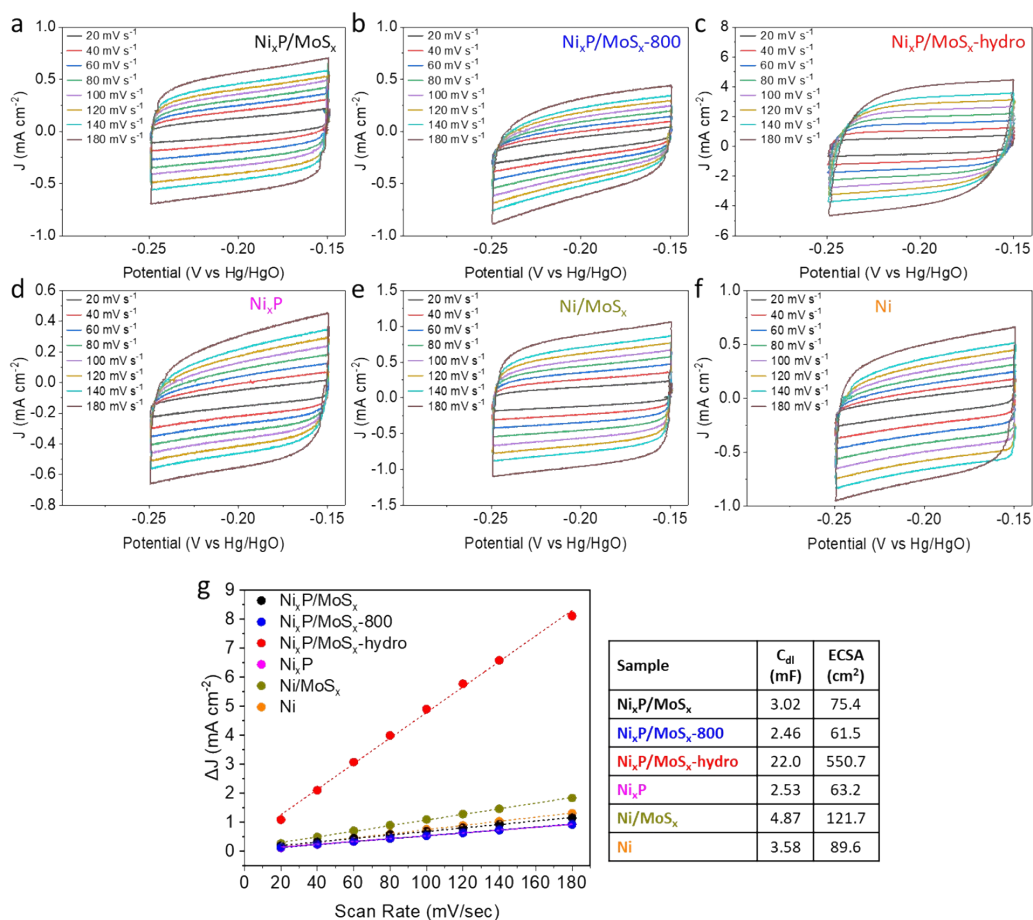

**Fig. S11.** (a-f) Cyclic voltammetry (CV) curves and (g) corresponding plot of capacitive current density ( $\Delta J$ ) versus scan rate, used to determine the double-layer capacitance ( $C_{dl}$ ) and estimate the electrochemically active surface area (ECSA) of the different  $\text{Ni}_x\text{P}$ -modified  $\text{MoS}_x$  catalysts and  $\text{Ni}_x\text{P}$ ,  $\text{Ni}$ , and  $\text{Ni}/\text{MoS}_x$  control samples. Inset: calculated  $C_{dl}$  and ECSA values.

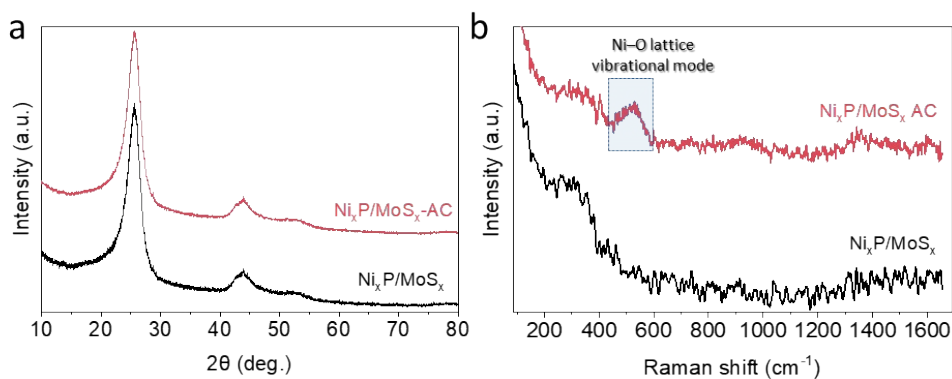

**Fig. S12.** (a) XRD patterns and (b) Raman spectra of  $\text{Ni}_x\text{P}/\text{MoS}_x$  before and after ( $\text{Ni}_x\text{P}/\text{MoS}_x$  AC) long-term HER testing.

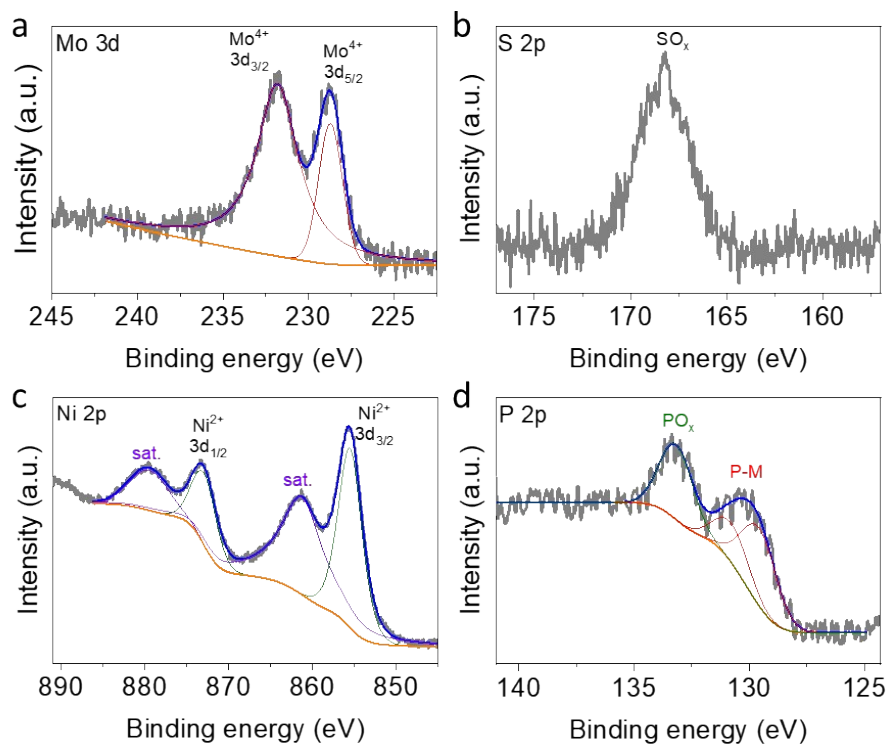

**Fig. S13.** XPS spectra of  $\text{Ni}_x\text{P}/\text{MoS}_x$  after long-term HER testing: (a) Mo 3d, (b) S 2p, (c) Ni 2p and (d) P 2p core-level spectra.

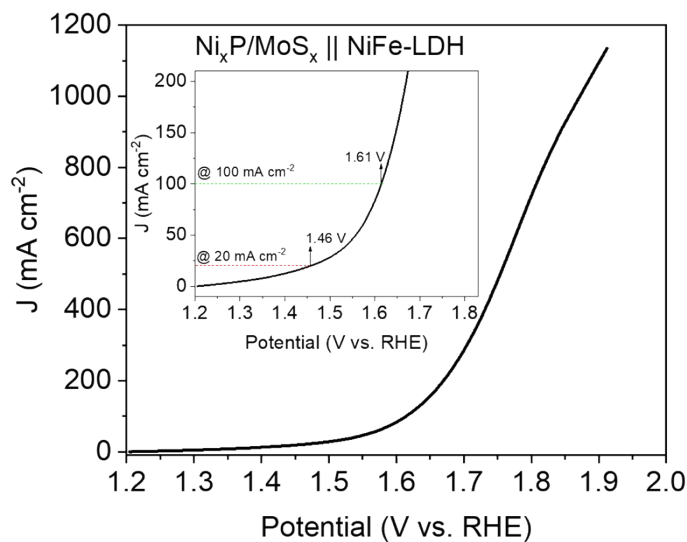

**Fig. S14.** Overall water-splitting polarization curve in 1.0 M KOH of the  $\text{Ni}_x\text{P}/\text{MoS}_x \parallel \text{NiFe-LDH}$  cell, using  $\text{Ni}_x\text{P}/\text{MoS}_x$  on carbon cloth as the cathode and NiFe-LDH on nickel foam as the anode. Inset: enlarged view showing cell voltages at 20 and 100  $\text{mA cm}^{-2}$ .

**Table S4.** Operando EIS fitting parameters for MoS<sub>x</sub> and Ni<sub>x</sub>P/MoS<sub>x</sub>, obtained using the Armstrong–Henderson equivalent circuit. ( $R_s$  denotes the solution resistance,  $Q_{dl}$  describe the non-ideal double-layer capacitance,  $R_{ct}$  the interfacial charge-transfer resistance, while  $R_{ad}$  and  $C_{ad}$  describe the respective adsorption pseudo-resistance and pseudo-capacitance of H\* intermediates).

| <b>MoS<sub>x</sub></b>                 |                          |                                              |          |                           |                            |                           |                        |
|----------------------------------------|--------------------------|----------------------------------------------|----------|---------------------------|----------------------------|---------------------------|------------------------|
| <b>Potential (V vs RHE)</b>            | <b>R<sub>s</sub> (Ω)</b> | <b>Q<sub>dl</sub> [mF·s<sup>(a-1)</sup>]</b> | <b>a</b> | <b>R<sub>ct</sub> (Ω)</b> | <b>C<sub>ad</sub> (mF)</b> | <b>R<sub>ad</sub> (Ω)</b> | <b>x<sup>2</sup></b>   |
| 0                                      | 1.71                     | 38.1                                         | 0.89     | 3.99                      | 10.02                      | 274.7                     | 4.3 × 10 <sup>-3</sup> |
| -0.05                                  | 1.70                     | 40.5                                         | 0.90     | 4.07                      | 10.80                      | 212.7                     | 4.7 × 10 <sup>-3</sup> |
| -0.10                                  | 1.70                     | 39.7                                         | 0.91     | 3.89                      | 11.97                      | 93.59                     | 5.1 × 10 <sup>-3</sup> |
| -0.15                                  | 1.70                     | 37.1                                         | 0.93     | 2.90                      | 13.92                      | 34.38                     | 5.6 × 10 <sup>-3</sup> |
| -0.20                                  | 1.70                     | 41.7                                         | 0.91     | 1.69                      | 16.84                      | 14.23                     | 4.3 × 10 <sup>-3</sup> |
| -0.25                                  | 1.71                     | 42.6                                         | 0.89     | 0.99                      | 22.02                      | 4.01                      | 2.5 × 10 <sup>-3</sup> |
| -0.30                                  | 1.70                     | 43.6                                         | 0.85     | 0.67                      | 25.03                      | 1.34                      | 9.9 × 10 <sup>-4</sup> |
| -0.35                                  | 1.71                     | 27.7                                         | 0.83     | 0.69                      | 24.84                      | 0.77                      | 5.5 × 10 <sup>-4</sup> |
| -0.40                                  | 1.70                     | 39.1                                         | 0.85     | 0.46                      | 32.45                      | 0.67                      | 1.2 × 10 <sup>-3</sup> |
| <b>Ni<sub>x</sub>P/MoS<sub>x</sub></b> |                          |                                              |          |                           |                            |                           |                        |
| <b>Potential (V vs RHE)</b>            | <b>R<sub>s</sub> (Ω)</b> | <b>Q<sub>dl</sub> [mF·s<sup>(a-1)</sup>]</b> | <b>a</b> | <b>R<sub>ct</sub> (Ω)</b> | <b>C<sub>ad</sub> (mF)</b> | <b>R<sub>ad</sub> (Ω)</b> | <b>x<sup>2</sup></b>   |
| 0                                      | 1.31                     | 150.6                                        | 0.90     | 0.43                      | 60.76                      | 51.35                     | 6.9 × 10 <sup>-4</sup> |
| -0.05                                  | 1.31                     | 154.6                                        | 0.88     | 0.35                      | 61.28                      | 26.58                     | 4.7 × 10 <sup>-4</sup> |
| -0.10                                  | 1.30                     | 171.4                                        | 0.83     | 0.27                      | 62.40                      | 5.97                      | 2.0 × 10 <sup>-4</sup> |
| -0.15                                  | 1.31                     | 180.9                                        | 0.82     | 0.30                      | 62.61                      | 1.79                      | 3.7 × 10 <sup>-4</sup> |
| -0.20                                  | 1.31                     | 180.4                                        | 0.82     | 0.31                      | 77.70                      | 0.77                      | 3.2 × 10 <sup>-4</sup> |
| -0.25                                  | 1.31                     | 160.1                                        | 0.82     | 0.22                      | 95.77                      | 0.47                      | 3.9 × 10 <sup>-4</sup> |
| -0.30                                  | 1.31                     | 166.7                                        | 0.78     | 0.17                      | 96.26                      | 0.34                      | 9.8 × 10 <sup>-4</sup> |
| -0.35                                  | 1.31                     | 137.3                                        | 0.82     | 0.16                      | 118.11                     | 0.24                      | 5.1 × 10 <sup>-4</sup> |
| -0.40                                  | 1.30                     | 134.2                                        | 0.79     | 0.14                      | 119.02                     | 0.20                      | 3.8 × 10 <sup>-4</sup> |

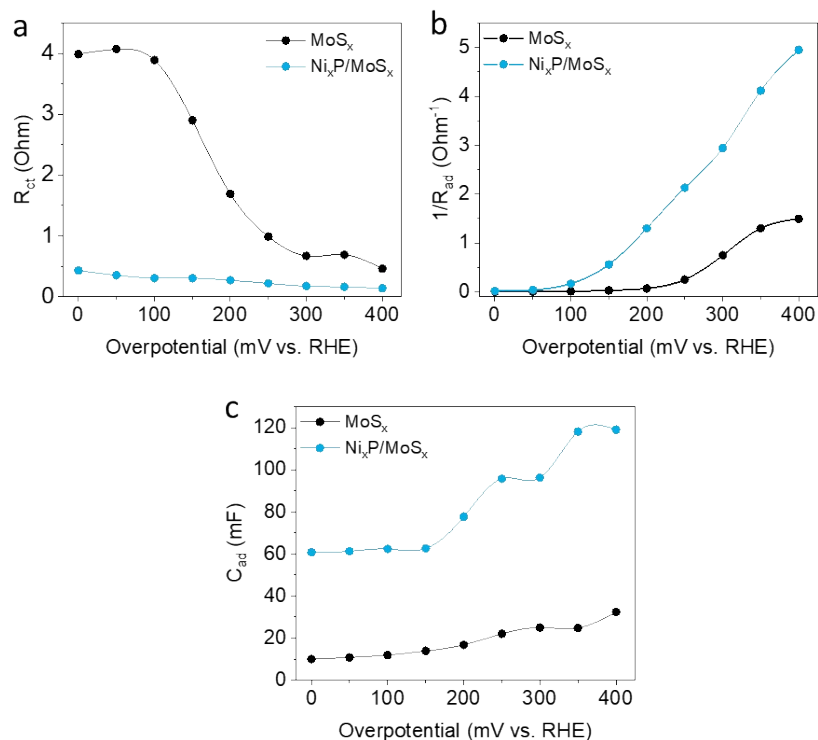

**Fig. S15.** Potential-dependent (a) interfacial charge-transfer resistance ( $R_{ct}$ ), (b) inverse adsorption resistance ( $1/R_{ad}$ ), and (c) adsorption pseudo-capacitance ( $C_{ad}$ ) plots derived from operando EIS measurements of MoS<sub>x</sub> and Ni<sub>x</sub>P/MoS<sub>x</sub>.

## References

- 1 S. G. Quiroz, S. Cartagena and J. A. Calderón, *Electrochim. Acta*, 2025, **528**, 146332.
- 2 C. C. L. McCrory, S. Jung, J. C. Peters and T. F. Jaramillo, *J. Am. Chem. Soc.*, 2013, **135**, 16977–16987.
- 3 C. Niu, H. Song, Y. Chang, W. Hou, Y. Li, Y. Zhao, Y. Xiao and G. Han, *J. Alloys Compd.*, 2022, **900**, 163509.
- 4 E. A. Ponomarev, M. Neumann-Spallart, G. Hodes and C. Lévy-Clément, *Thin Solid Films*, 1996, **280**, 86–89.
- 5 L. Li, Y. Zhang, S. Deng and Y. Chen, *Mater. Lett.*, 2003, **57**, 3444–3448.
- 6 J. Xie, H. Zhang, S. Li, R. Wang, X. Sun, M. Zhou, J. Zhou, X. W. Lou and Y. Xie, *Adv. Mater.*, 2013, **25**, 5807–5813.
- 7 Y. Yin, J. Han, Y. Zhang, X. Zhang, P. Xu, Q. Yuan, L. Samad, X. Wang, Y. Wang, Z. Zhang, P. Zhang, X. Cao, B. Song and S. Jin, *J. Am. Chem. Soc.*, 2016, **138**, 7965–7972.
- 8 S. Duraisamy, A. Ganguly, P. K. Sharma, J. Benson, J. Davis and P. Papakonstantinou, *ACS Appl. Nano Mater.*, 2021, **4**, 2642–2656.
- 9 L. Li, Y. Zhang, S. Deng and Y. Chen, *Mater. Lett.*, 2003, **57**, 3444–3448.

- 10 R. N. Wasalathanthri, S. Jeffrey, N. Su, K. Sun and D. M. Giolando, *ChemistrySelect*, 2017, **2**, 8020–8027.
- 11 Y. R. Liu, W. H. Hu, X. Li, B. Dong, X. Shang, G. Q. Han, Y. M. Chai, Y. Q. Liu and C. G. Liu, *Appl. Surf. Sci.*, 2016, **383**, 276–282.
- 12 G. Q. Han, X. Li, J. Xue, B. Dong, X. Shang, W. H. Hu, Y. R. Liu, J. Q. Chi, K. L. Yan, Y. M. Chai and C. G. Liu, *Int. J. Hydrogen Energy*, 2017, **42**, 2952–2960.
- 13 Y. Dai, W. Chen, B. Guo, X. Li, J. Guan, L. Wang and M. Zhang, *J. Alloys Compd.*, 2022, **905**, 164157.
- 14 S. Hu, Q. Cao, H. Yao, Y. Jia and X. Guo, *ChemCatChem*, 2024, **16**, e202301420.
- 15 C. Gao, Z. Li, H. Wang, Y. Yang, B. Li, Z. Peng, J. Li and Z. Liu, *ChemElectroChem*, 2020, **7**, 355–361.
- 16 B. Zhang, K. Xu, X. Fu, S. Guan, X. Li and Z. Peng, *J. Alloys Compd.*, 2021, **856**, 158094.
- 17 T. Liang, Y. Tian, Z. Dai, S. Lenus and J. Xie, *J. Alloys Compd.*, 2023, **965**, 171416.
- 18 X. Yu, S. Xu, Z. Wang, S. Wang, J. Zhang, Q. Liu, Y. Luo, Y. Du, X. Sun and Q. Wu, *Dalton Trans.*, 2021, **50**, 15094–15102.
